# Supplementary material for: Do wealth and inequality associate with health in a small-scale subsistence society?
Source: eLife journal article supplement (doi:10.7554/elife.59437), 2021-05-14
Supplement: supp [file elife-59437-supp-v1.zip]

Archive with 7 entries (7 files):
- elife_poa_e59437_Supplementary_file_1.docx
- elife_poa_e59437_Figure_1_figure_supplement_1.jpg
- elife_poa_e59437_Figure_2_figure_supplement_1.tif
- elife_poa_e59437_Figure_2_figure_supplement_2.tif
- elife_poa_e59437_Figure_2_figure_supplement_3.tif
- elife_poa_e59437_Figure_3_figure_supplement_1.tif
- elife_poa_e59437_Transparent_Reporting_File.pdf
