# Supplementary figures and images for: Do wealth and inequality associate with health in a small-scale subsistence society?
Source: eLife journal article supplement (doi:10.7554/elife.59437), 2021-05-14

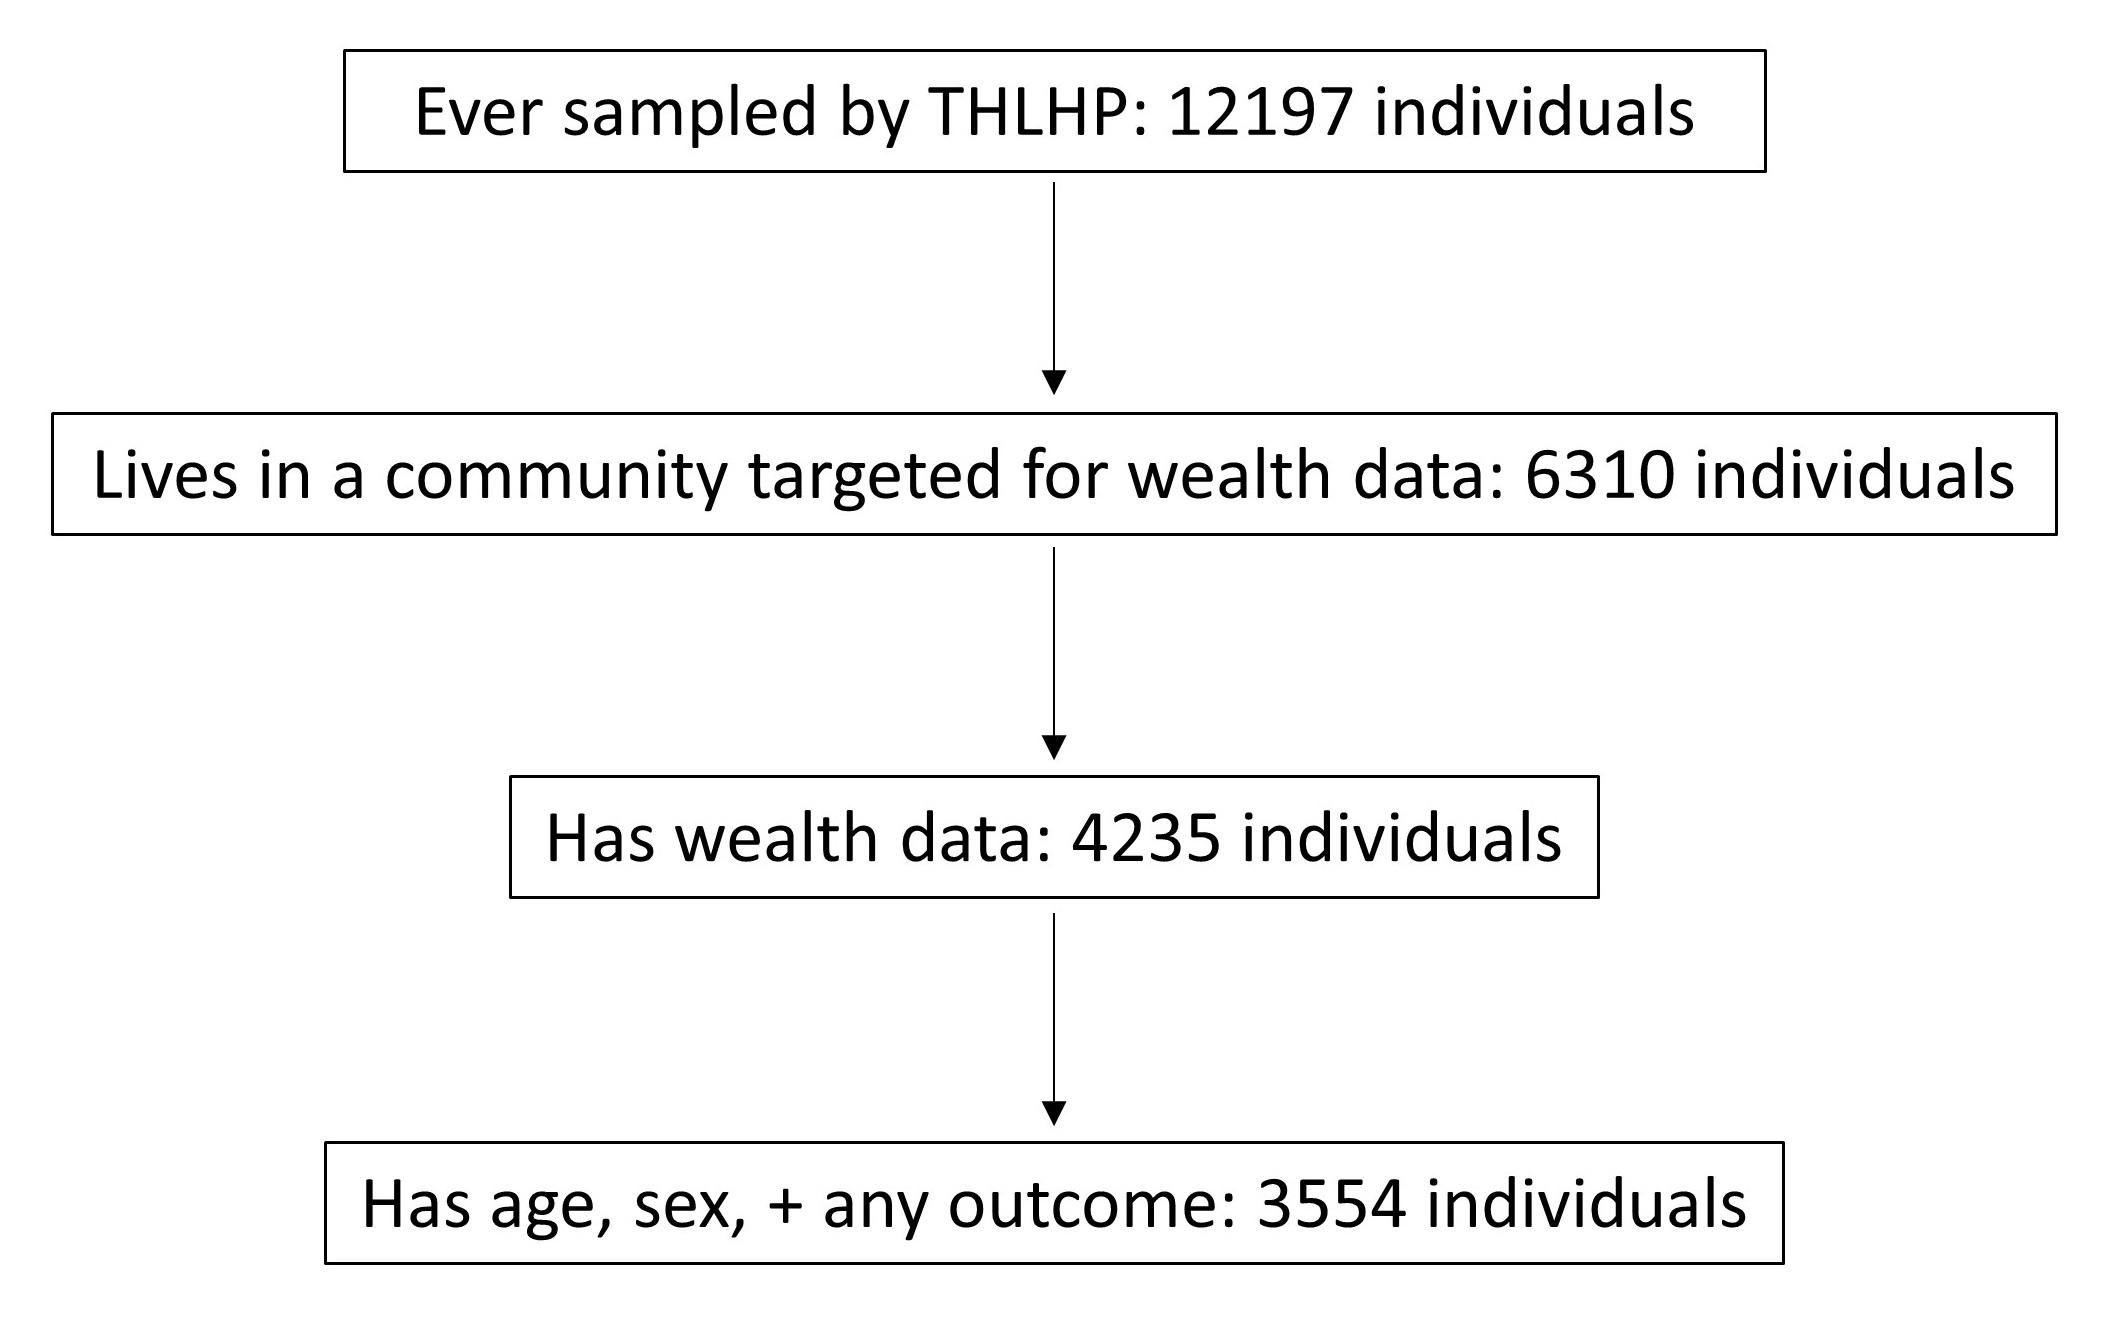

Supplement: supp [file elife-59437-supp-v1.zip › elife_poa_e59437_Figure_1_figure_supplement_1.jpg]

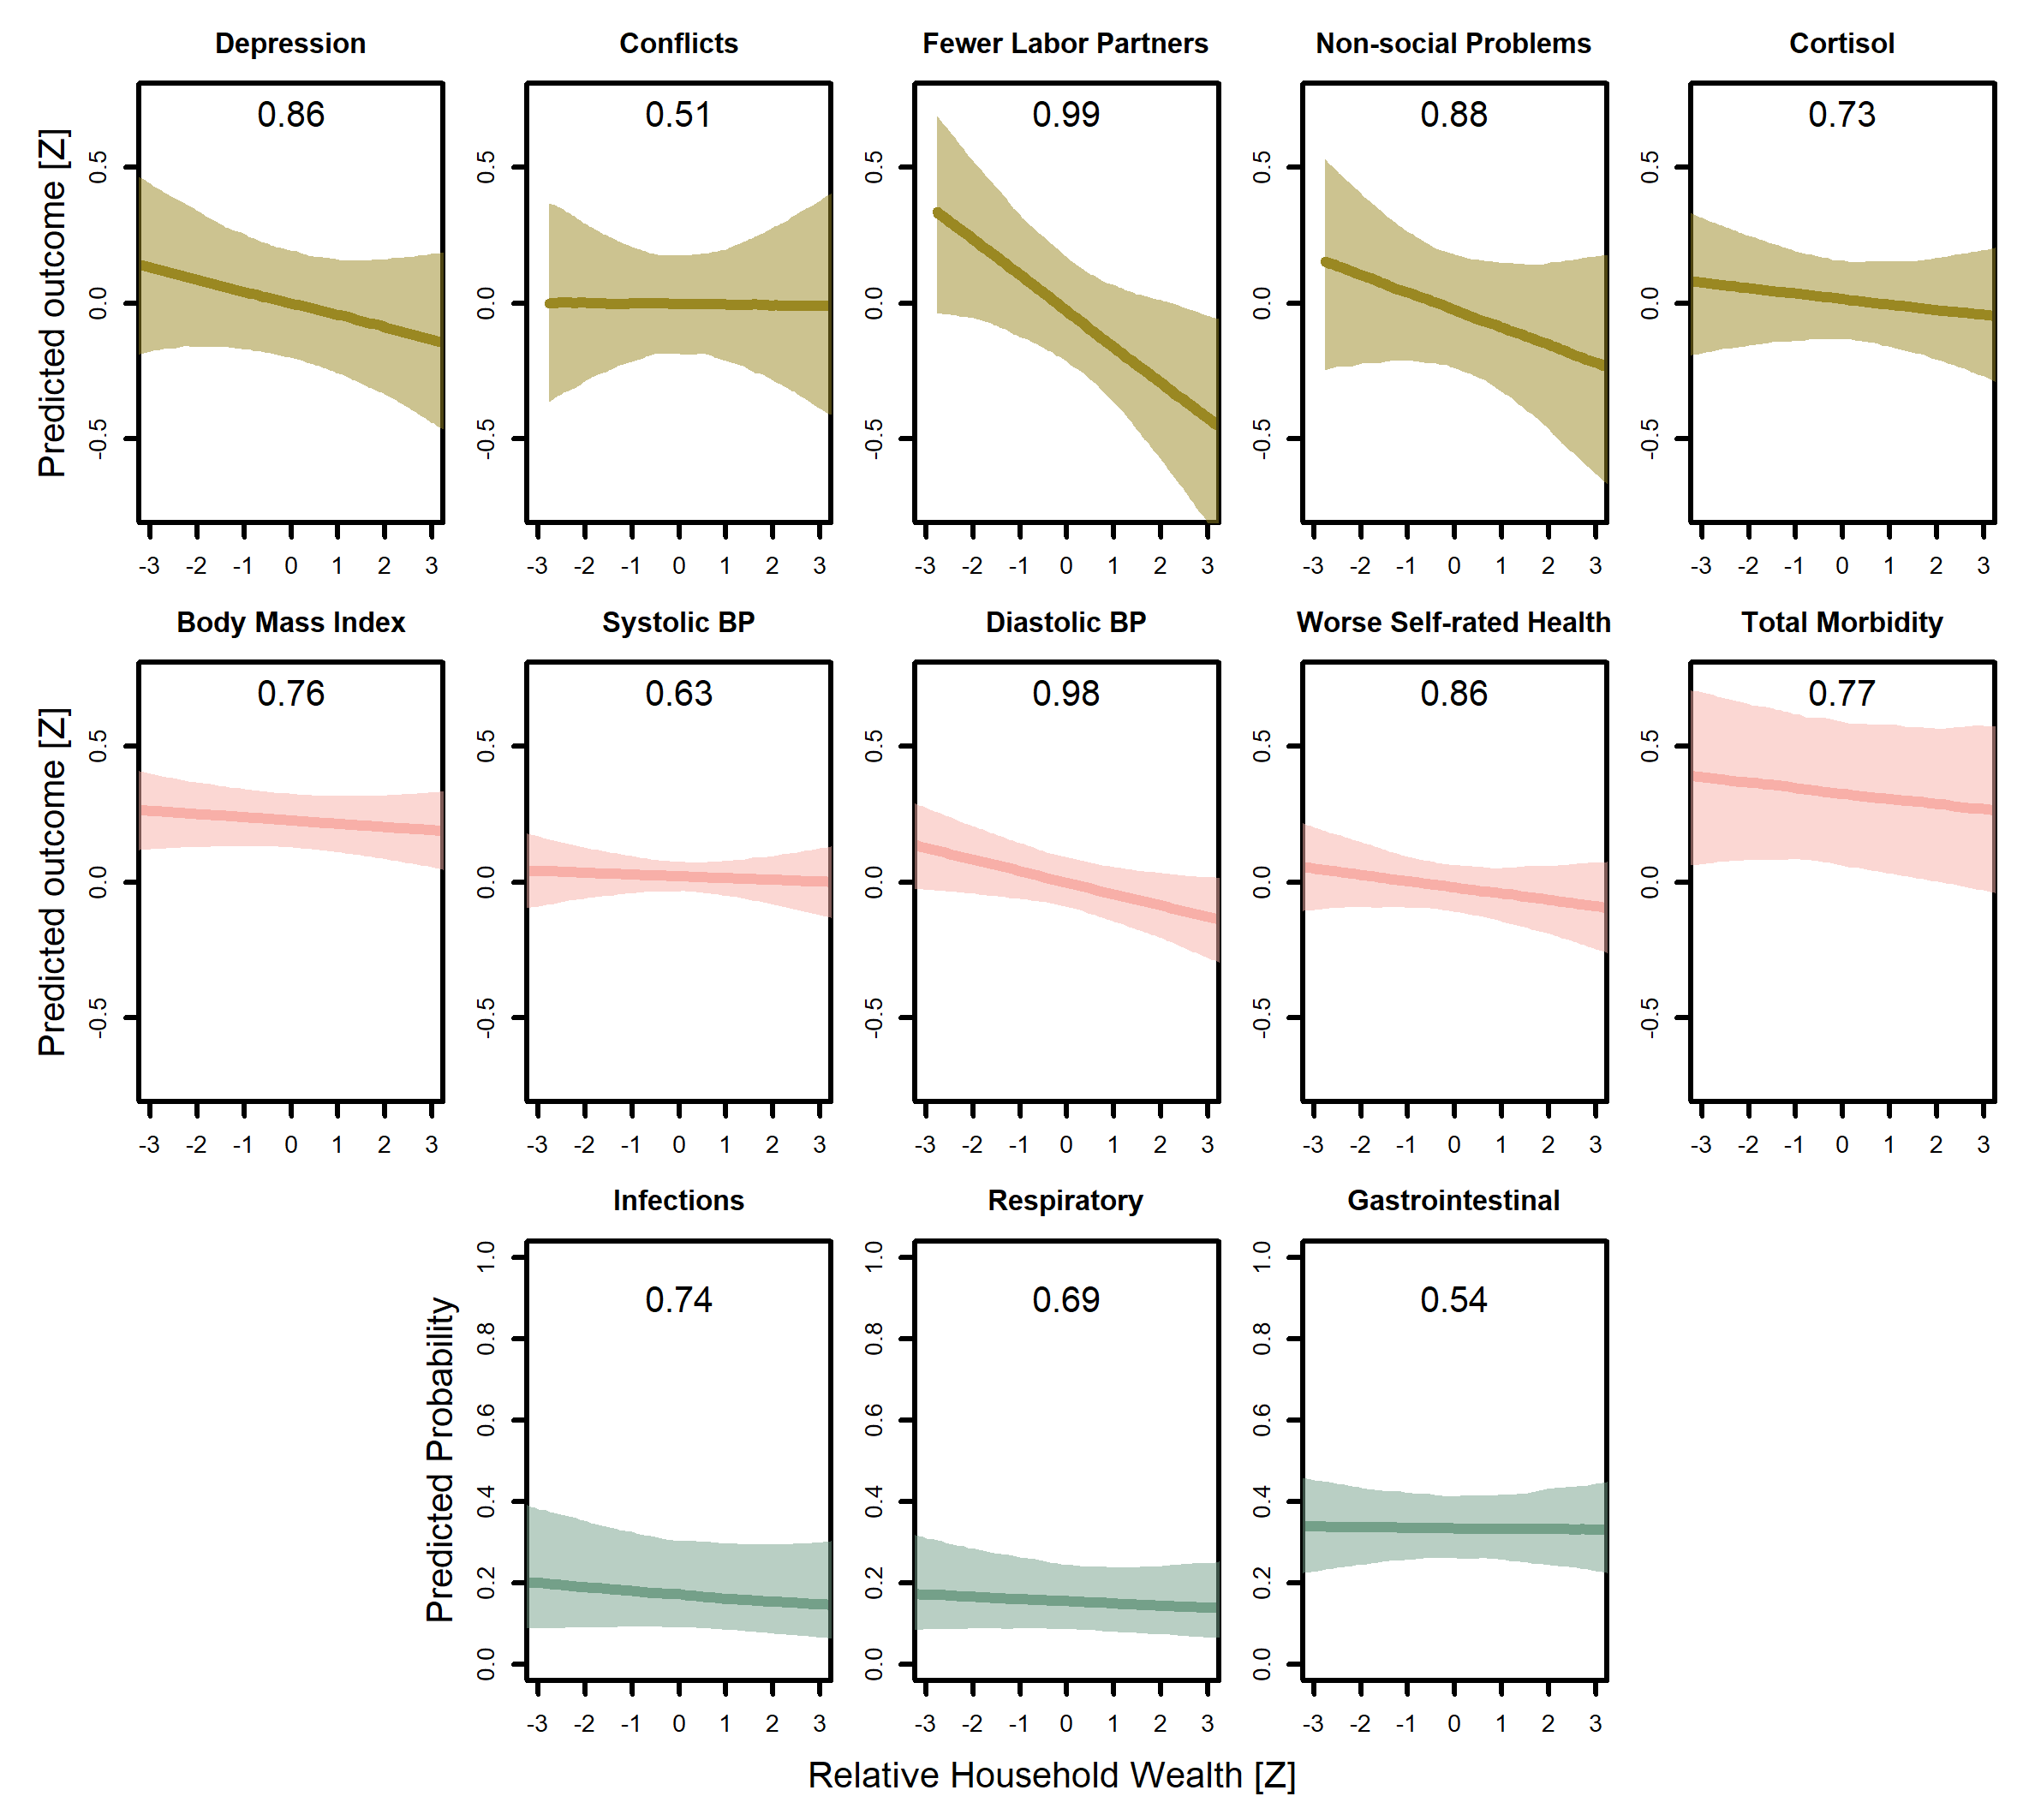

Supplement: supp [file elife-59437-supp-v1.zip › elife_poa_e59437_Figure_2_figure_supplement_1.tif]

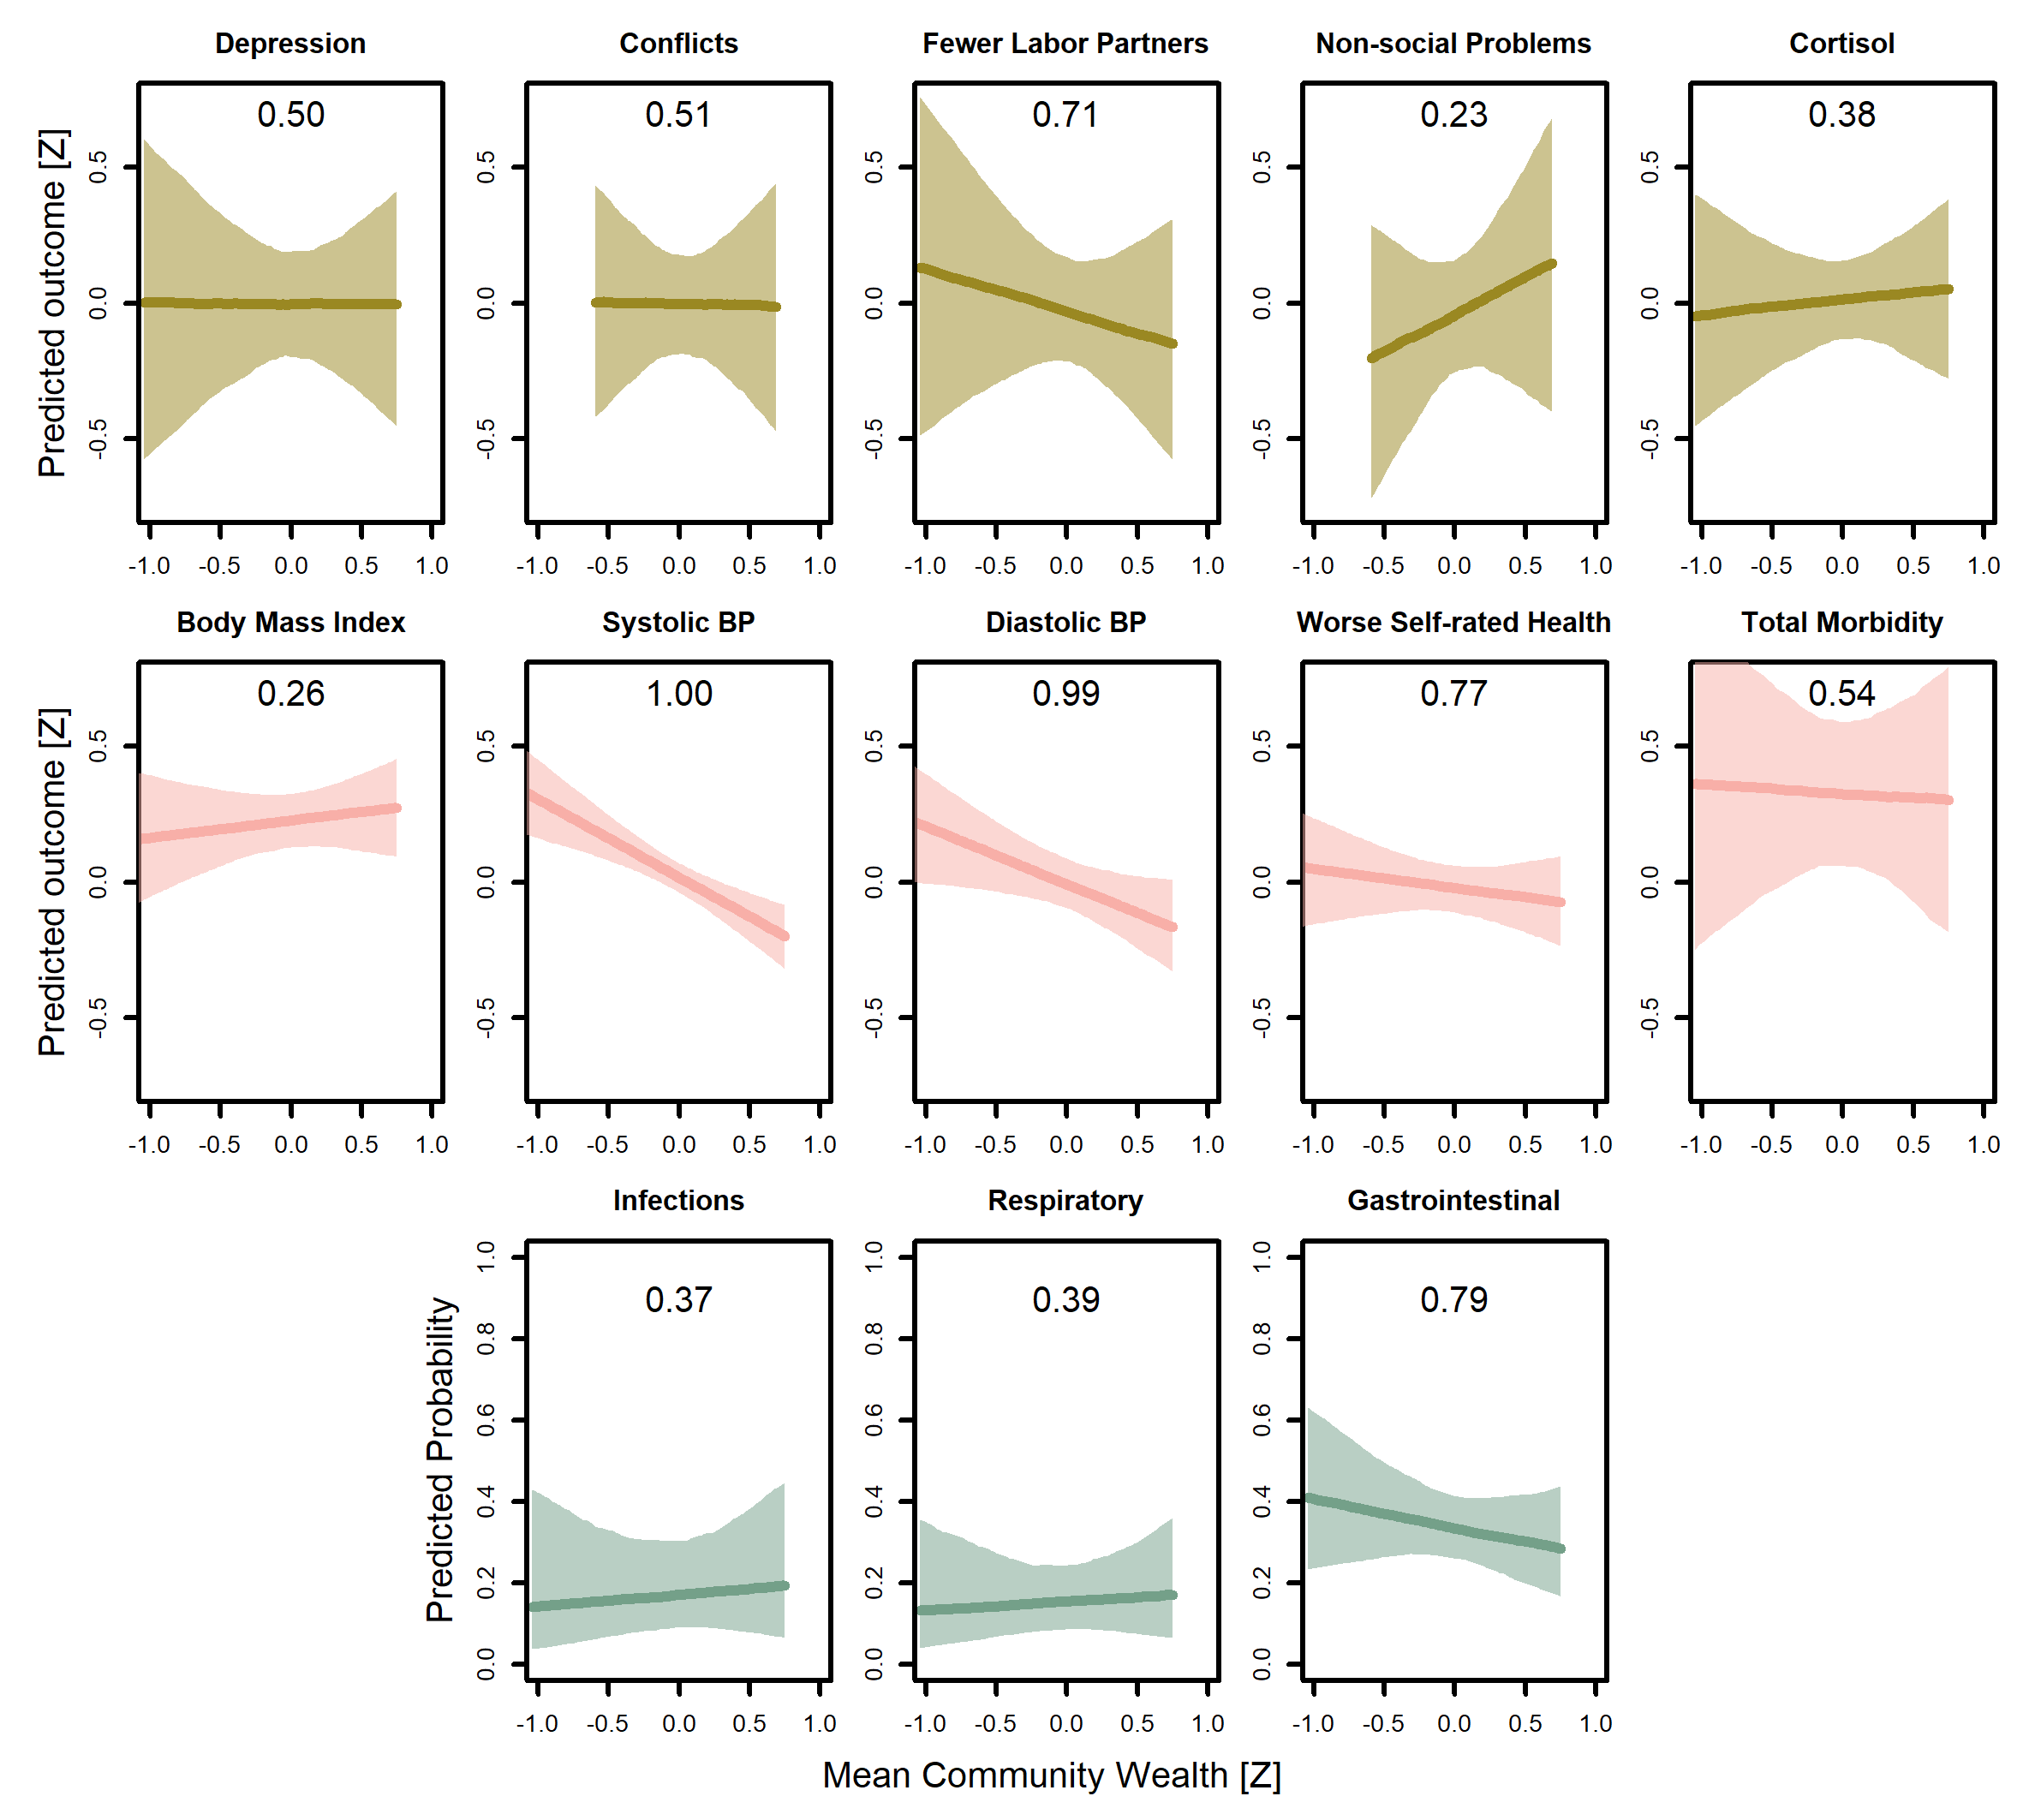

Supplement: supp [file elife-59437-supp-v1.zip › elife_poa_e59437_Figure_2_figure_supplement_2.tif]

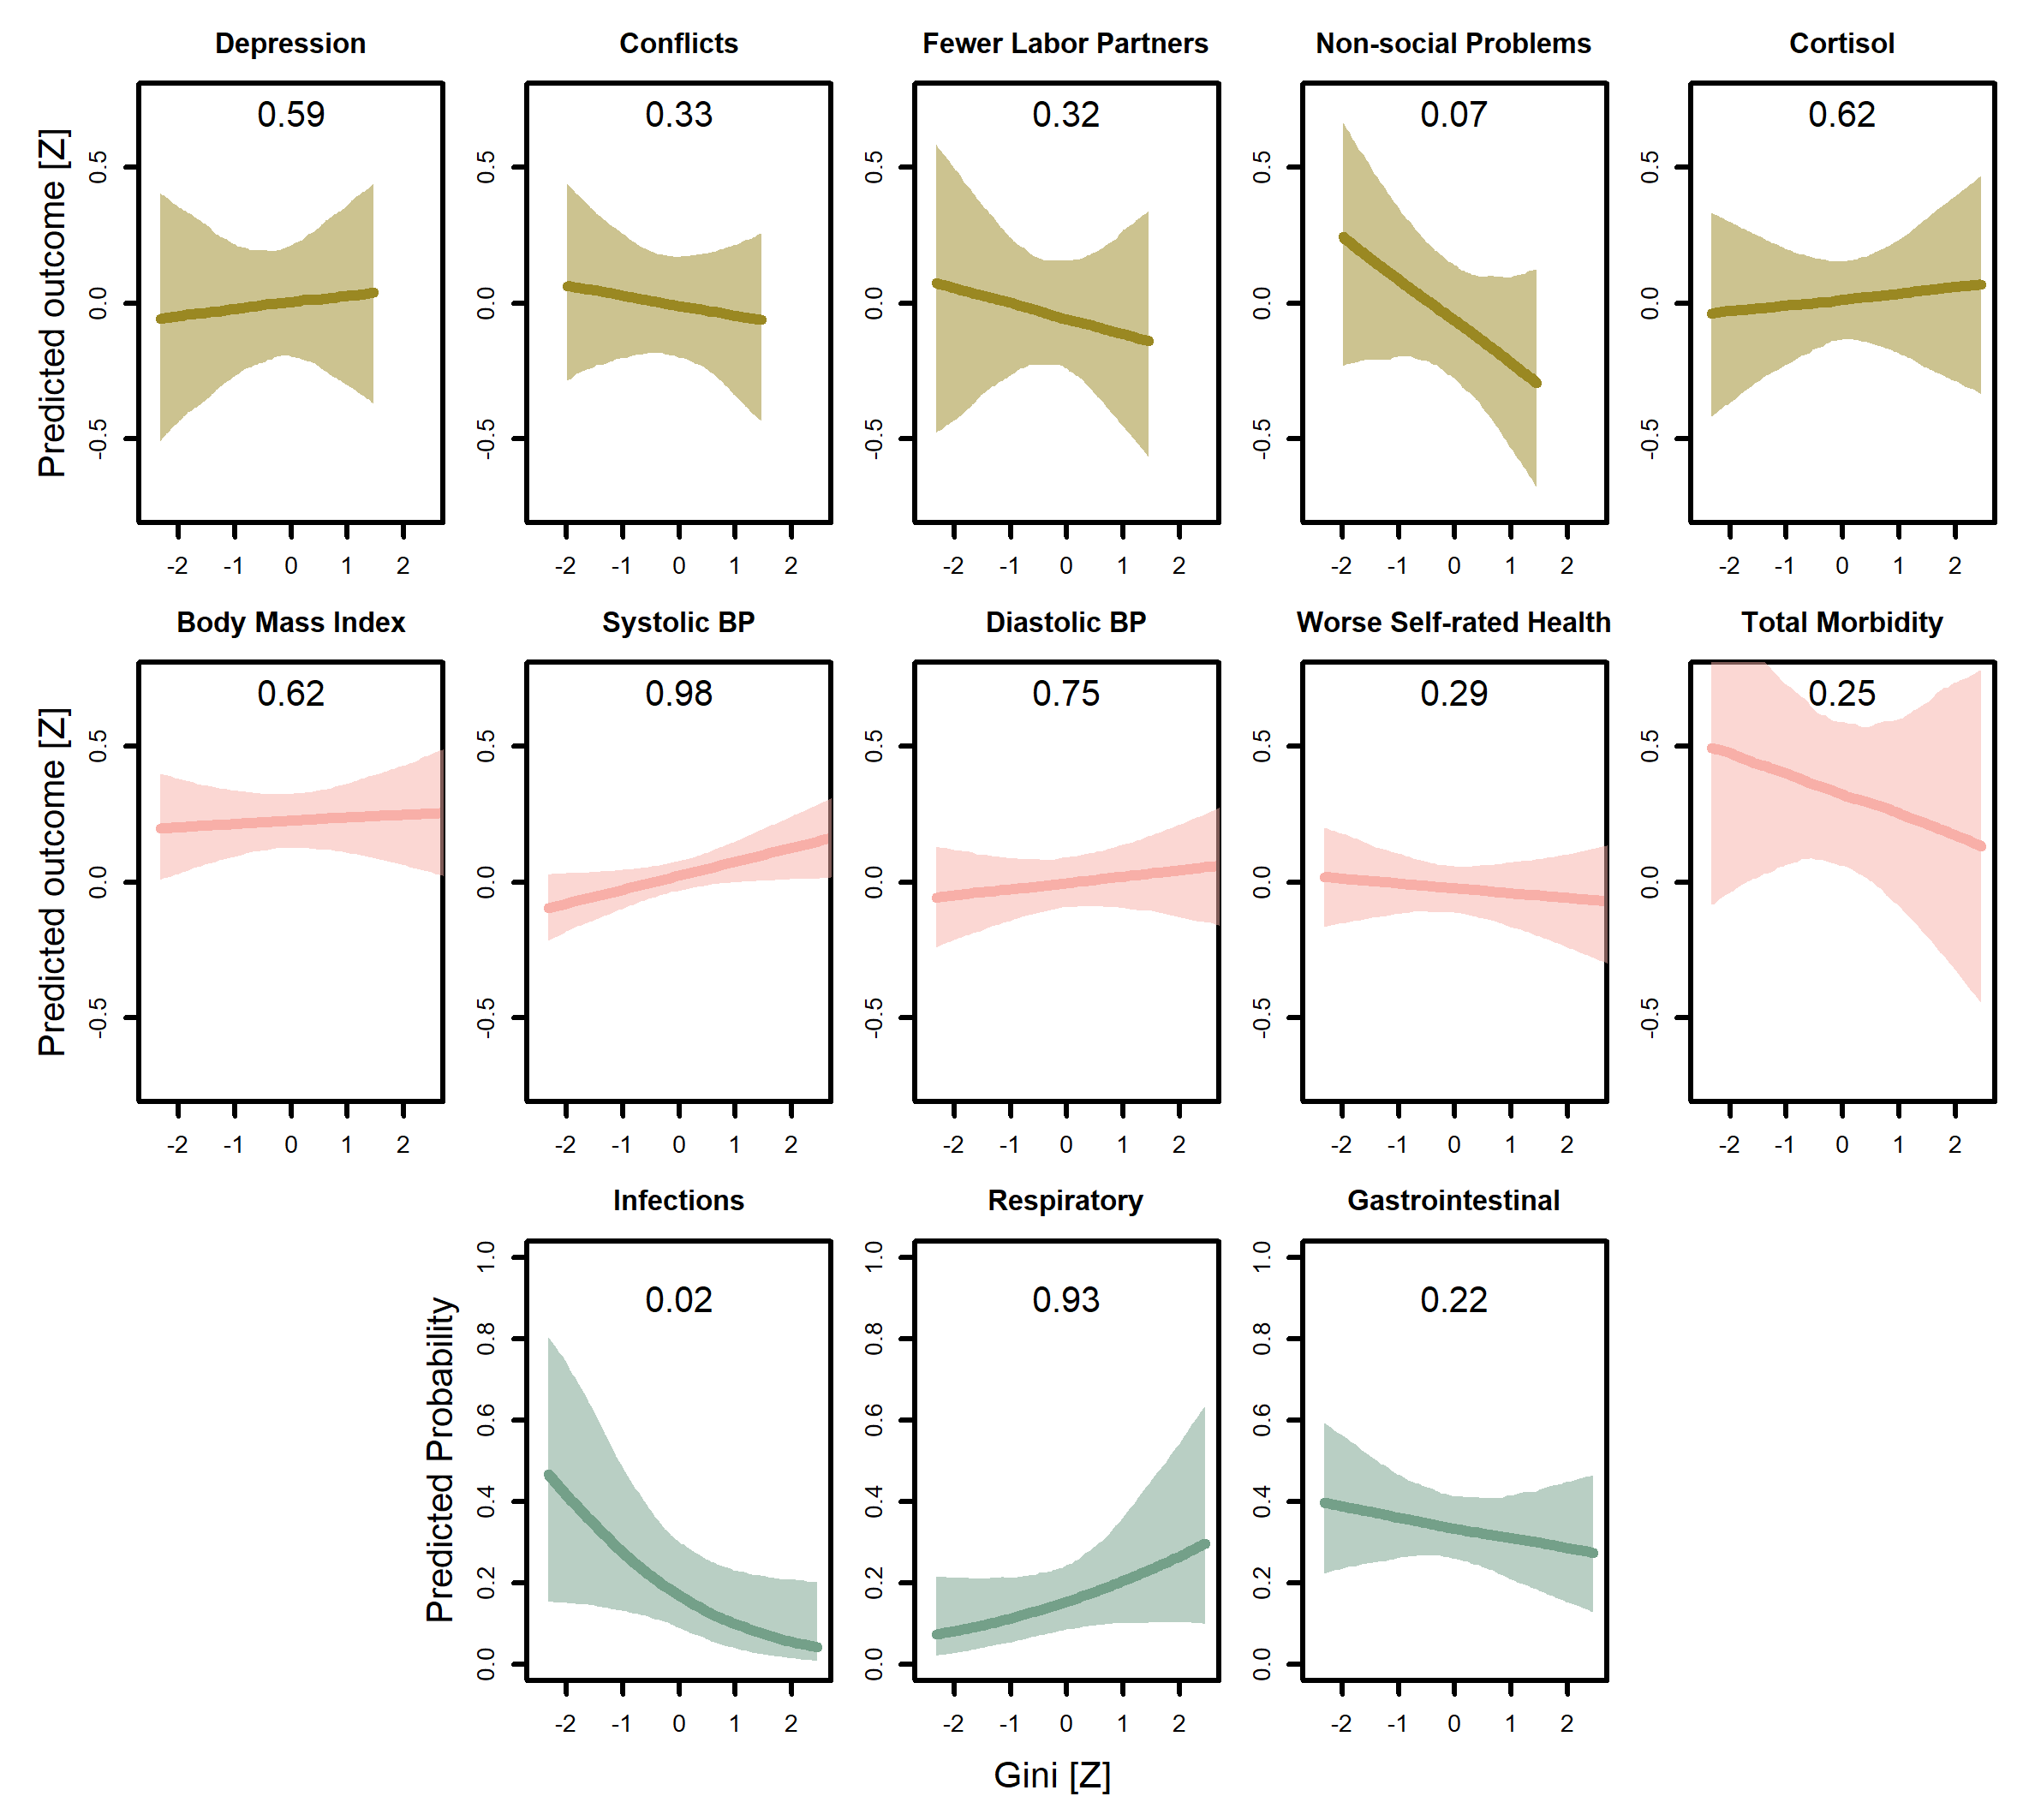

Supplement: supp [file elife-59437-supp-v1.zip › elife_poa_e59437_Figure_2_figure_supplement_3.tif]

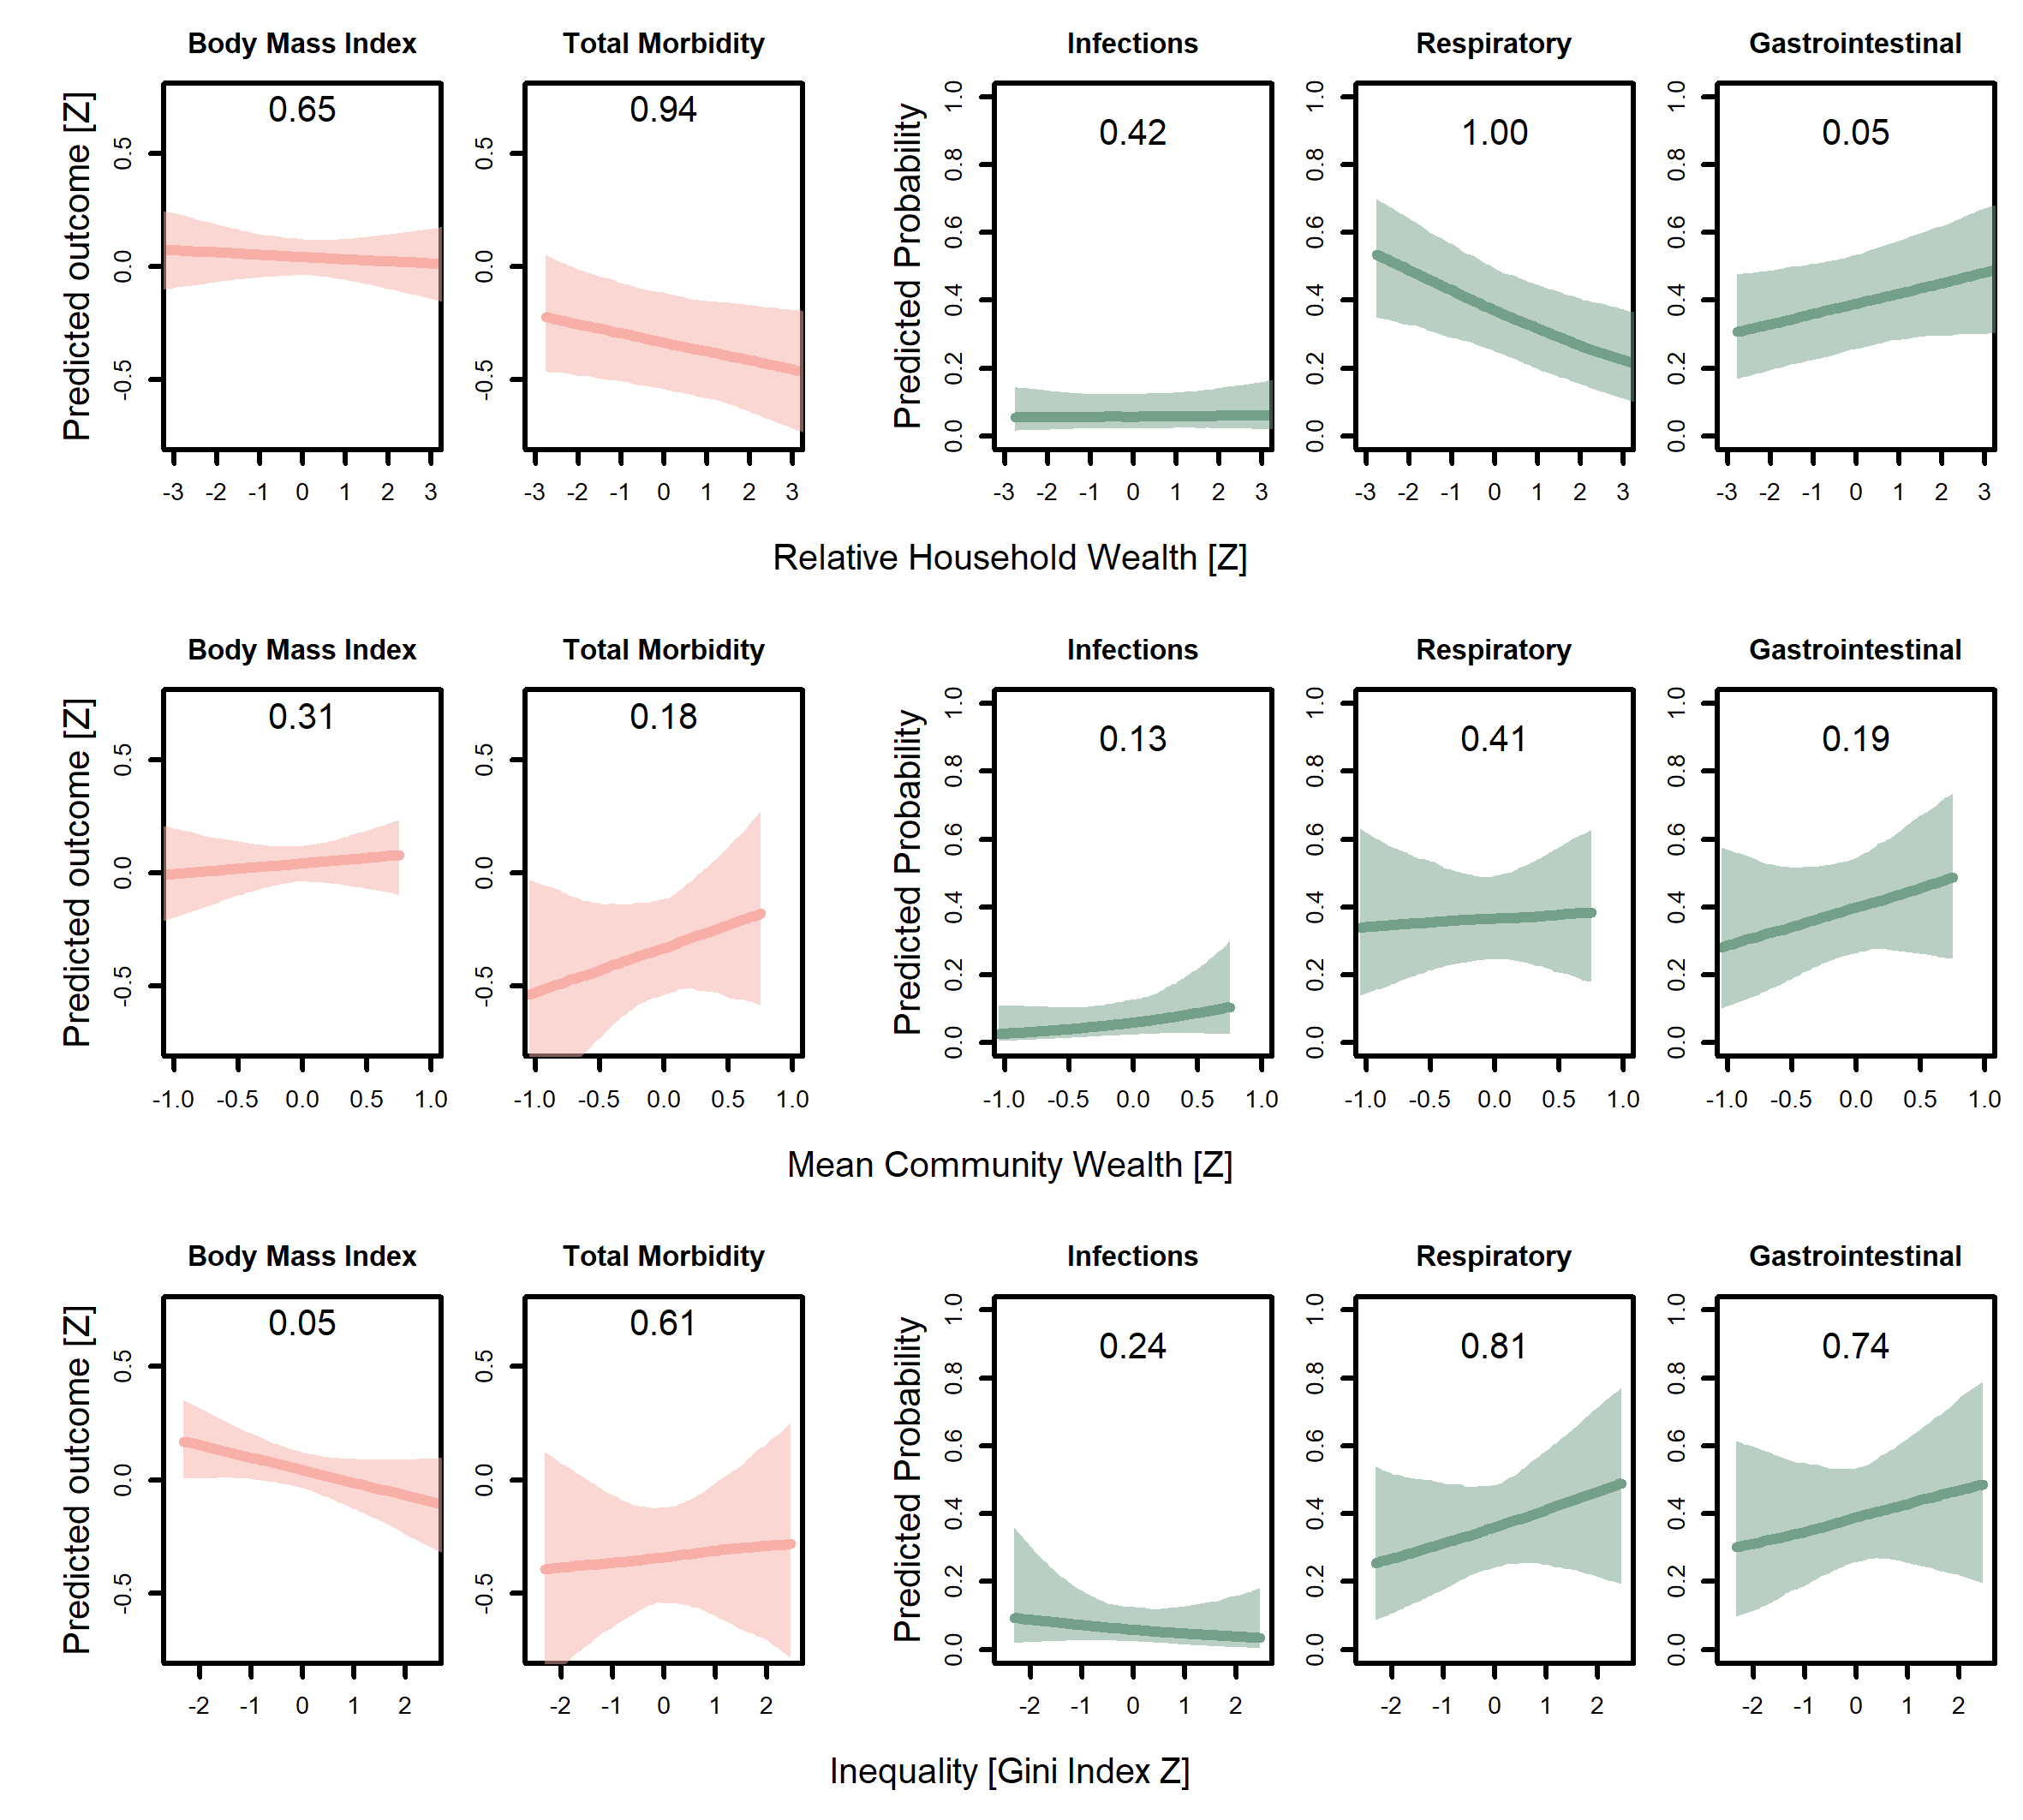

Supplement: supp [file elife-59437-supp-v1.zip › elife_poa_e59437_Figure_3_figure_supplement_1.tif]
